## **Title: ChAdOx1 NiV vaccination protects against lethal Nipah Bangladesh virus infection in African green monkeys**

**Authors:** Neeltje van Doremalen<sup>1</sup>, Victoria A. Avanzato<sup>1</sup>, Friederike Feldmann<sup>2</sup>, Jonathan E. Schulz<sup>1</sup>, Elaine Haddock<sup>1</sup>, Atsushi Okumura<sup>1</sup>, Jamie Lovaglio<sup>2</sup>, Patrick W. Hanley<sup>2</sup>, Kathleen Cordova<sup>2</sup>, Greg Saturday<sup>2</sup>, Teresa Lambe<sup>3</sup>, Sarah C. Gilbert<sup>3</sup>, Vincent J. Munster<sup>1\*</sup>

**Affiliations:**

<sup>1</sup>Laboratory of Virology, National Institute of Allergy and Infectious Diseases, National Institutes of Health, Hamilton, MT, USA

<sup>2</sup>Rocky Mountain Veterinary Branch, National Institute of Allergy and Infectious Diseases, National Institutes of Health, Hamilton, MT, USA

<sup>3</sup>The Jenner Institute, Nuffield Department of Medicine, University of Oxford, Oxford, UK

\*To whom correspondence should be addressed: [vincent.munster@nih.gov](mailto:vincent.munster@nih.gov)

**One Sentence Summary:** A single vaccination with ChAdOx1 NiV protects African green monkeys against lethal disease induced by Nipah virus inoculation.

1   **Abstract:** Nipah virus (NiV) is a highly pathogenic and re-emerging virus which causes sporadic  
2   but severe infections in humans. Currently, no vaccines against NiV have been approved. We  
3   previously showed that ChAdOx1 NiV provides full protection against a lethal challenge with  
4   NiV Bangladesh (NiV-B) in hamsters. Here, we investigated the efficacy of ChAdOx1 NiV in  
5   the lethal African green monkeys (AGMs) NiV challenge model. AGMs were vaccinated either 4  
6   weeks before challenge (prime vaccination), or 8 and 4 weeks before challenge with ChAdOx1  
7   NiV (prime-boost vaccination). A robust humoral and cellular response was detected starting 14  
8   days post initial vaccination. Upon challenge, control animals displayed a variety of signs and  
9   had to be euthanized between 5- and 7-days post inoculation. In contrast, vaccinated animals  
10   showed no signs of disease, and we were unable to detect infectious virus in all but one swab  
11   and all tissues. Importantly, no to limited antibodies against fusion protein or nucleoprotein IgG  
12   could be detected 42 days post challenge, suggesting that vaccination induced a very robust  
13   protective immune response preventing extensive virus replication.

14

## 15 **Introduction**

16 Nipah virus (NiV) is a highly pathogenic re-emerging member of the *Paramyxovirus* family,  
17 genus *Henipavirus*. NiV causes sporadic infections in humans, resulting in severe neurological  
18 and respiratory disease, often with a fatal outcome. NiV was first detected in 1998, when the  
19 strain NiV-Malaysia (NiV-M) caused an outbreak of severe encephalitis in pig farmers from  
20 Malaysia and Singapore, with a case-fatality rate of 38%<sup>1</sup>. Since 2001, outbreaks with a closely  
21 related strain, NiV-Bangladesh (NiV-B), have occurred almost yearly in Bangladesh<sup>2</sup>, resulting  
22 in 319 accumulated cases and 225 associated deaths (case-fatality rate 71%)<sup>3</sup>. Most recently,  
23 outbreaks have also been reported in India<sup>4</sup>.

24 The natural reservoir of NiV is the *Pteropus spp.* fruit bat<sup>5-7</sup>. Outbreaks in Bangladesh and India  
25 have been associated with the consumption of date palm sap, which may have been contaminated  
26 with bat urine<sup>8-10</sup>. In contrast, in Malaysia and Singapore, pigs were the intermediate host, likely  
27 infected via the consumption of mango fruits, which were contaminated with NiV after partial  
28 consumption by bats<sup>11</sup>. Importantly, human-to-human transmission of NiV has also been  
29 reported<sup>12,13</sup>.

30 Although the total number of cases caused by NiV are limited, the virus causes severe disease  
31 and transmits between humans<sup>12,13</sup>, and can infect a wide range of animals<sup>14</sup>, and thus NiV is  
32 categorized by the WHO as a pathogen with epidemic potential which poses a great public health  
33 risk and requires research aimed at the development of countermeasures.

34 Several vaccine candidates have been evaluated in animal models<sup>15</sup>. The most extensively  
35 studied vaccine to date is based on the glycoprotein of Hendra virus (HeV), another member of  
36 the genus *Henipavirus*<sup>16</sup>. HeV-sG, a soluble form of the HeV receptor binding glycoprotein, was  
37 marketed by Zoetis, Inc., in Australia as an equine vaccine against HeV under the name  
38 Equivac<sup>®</sup> HeV. It is the first commercialized vaccine against a BSL-4 agent<sup>17</sup>.

39 Recently, it was shown that HeV-sG vaccination can protect African green monkeys (AGMs)  
40 against lethal NiV disease as early as 7 days post immunization<sup>17</sup>. Enrollment has started for a  
41 Phase I randomized placebo-controlled clinical trial on NiV-vaccine candidate HeV-sG-V, which  
42 is based on HeV-sG, with results expected in October 2021 (ClinicalTrials.gov NCT04199169).  
43 This clinical trial is the first of its kind for NiV and is the result of a global partnership between  
44 Auro Vaccines LLC and the Coalition of Epidemic Preparedness Innovations (CEPI).

45 In the current study, we are testing efficacy of a different NiV vaccine candidate in AGMs.  
46 ChAdOx1 is a replication-deficient simian adenoviral vector, which has been developed for a  
47 multitude of different pathogens by the University of Oxford. A vaccine based on this vector  
48 named ChAdOx1 nCoV-19 (also known as AZD1222, Vaxzevria, or Covishield) has been  
49 developed against severe acute respiratory syndrome coronavirus 2 (SARS-CoV-2), the  
50 etiological agent of COVID-19. ChAdOx1 nCoV-19 has been fully approved in Brazil and  
51 approved for emergency use in 64 additional countries. The effectiveness of the vaccine is 92%  
52 and is 79% against symptomatic infection<sup>18,19</sup>.

53 We have previously demonstrated that a single dose of ChAdOx1 NiV, which encodes the  
54 receptor binding protein (G) of NiV-B, fully protected Syrian hamsters against a lethal dose of  
55 NiV-B or NiV-M<sup>20</sup>. In the current study, we investigate whether ChAdOx1 NiV is protective in  
56 the lethal NiV AGM model<sup>21</sup>. We show that a single dose of ChAdOx1 NiV results in a robust  
57 innate and adaptive immune response, which is fully protective against lethal disease in AGMs.  
58 Furthermore, no to limited immune response against nucleoprotein or fusion protein was  
59 detected in vaccinated animals post challenge, but was detected in control challenged animals,  
60 suggesting that vaccination provides near complete protection against NiV infection.

61

## 62 **Results**

63 *ChAdOx1 NiV vaccination of African green monkeys elicits a potent adaptive immune response*

64 Four animals per group were vaccinated via the intramuscular (I.M.) route with ChAdOx1 NiV  
65 using a prime-boost regimen at 56 and 28 days before challenge, or a prime-only regimen at 28  
66 days before challenge. As a control, four animals were vaccinated via the I.M. route with  
67 ChAdOx1 GFP at 56 and 28 days before challenge. Binding antibody titers against NiV G  
68 protein were determined at day of vaccination, 14 days post vaccination, and day of challenge.  
69 NiV G-specific IgG antibodies could be detected as early as 14 days post vaccination and were  
70 significantly increased upon boost vaccination (Two-tailed Mann-Whitney test,  $p=0.0286$ ). All  
71 vaccinated animals had detectable NiV G-specific antibodies on the day of challenge (Figure  
72 1A). No NiV G-specific IgG antibodies were detected in control animals. Likewise, virus  
73 neutralizing antibodies were detected in all vaccinated animals at day of challenge and were  
74 significantly increased upon boost vaccination (Figure 1B, Mann-Whitney test,  $p=0.0286$ ). NiV  
75 G-specific T cell responses were investigated using a peptide library divided into six peptide

76 pools that spanned the full length of NiV G. A single vaccination resulted in specific T cell  
77 responses in all animals, and a subsequent boost vaccination raised T cell responses significantly  
78 above control T cell responses (Figure 1C, Mann-Whitney test,  $p = 0.0271$ ).  
79

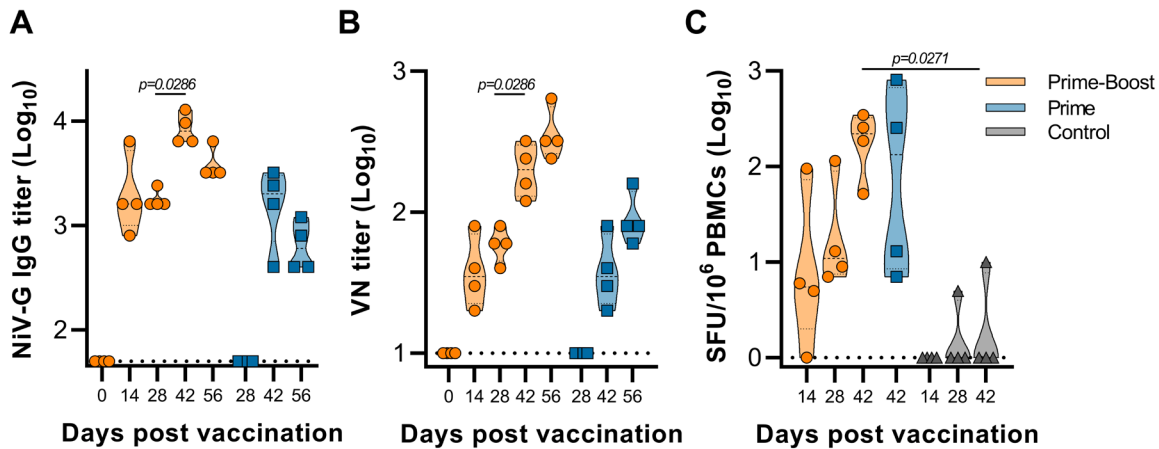

80

81 **Figure 1. Vaccination with ChAdOx1 NiV in AGMs induces humoral and cellular immune**  
82 **responses. (A)** Truncated violin plot shows evidence of NiV-G-specific IgG in serum at the  
83 indicated days post prime vaccination in animals receiving intramuscular ChAdOx1 NiV via a  
84 prime-boost (orange, n=4) or prime-only regimen (blue, n=4). **(B)** Truncated violin plot of  
85 neutralizing antibodies in serum are shown. **(C)** Truncated violin plot of NiV-G protein-specific  
86 T cell responses in PBMCs isolated from vaccinated or controls animals at indicated time points  
87 minus 0 days post vaccination (DPV) response. SFU, spot-forming units. Black lines indicate  
88 median; dotted lines indicate quartiles. The dotted line shows the limit of detection.

89

90 *Vaccinated animals do not show signs of disease*

91 Animals were inoculated with  $2 \times 10^5$  TCID<sub>50</sub> of NiV-B, split equally between the intranasal and  
92 intratracheal route. Animals were checked daily for clinical signs. Animals vaccinated with  
93 ChAdOx1 GFP displayed a variety of signs starting at 3 days post inoculation (DPI), including  
94 neurological signs and respiratory signs (Table S1). All four animals in this group reached an  
95 endpoint clinical score of 35 or higher between 5 to 7 DPI and were euthanized. In contrast, no  
96 signs of disease were observed in animals vaccinated with ChAdOx1 NiV (Figure 2A-B, Table  
97 S1). Exams were performed on 0, 3, 5, 7, 10, 14, 21, 28, 35, and 42 DPI. Radiographs were  
98 scored as previously described<sup>22</sup>. Whereas no to limited changes from baseline were observed in  
99 ChAdOx1 NiV vaccinated animals (score between 0-2), radiograph scores of control-vaccinated  
100 animals started increasing at 3 DPI (score between 0-3) and continued to increase until day of

101 necropsy (score between 7-14, Figure 2C). Throat and nose swabs were collected on all exam  
 102 days and the presence of infectious virus was investigated. Infectious virus could be detected in  
 103 both nose and throat swabs of 3 out of 4 control-vaccinated animals. In contrast, all swabs  
 104 obtained from animals vaccinated with ChAdOx1 NiV were negative, except for one throat swab  
 105 obtained at 3 DPI from one animal (animal 1) in the prime-boost group (Figure 2D-E). The  
 106 presence of binding antibodies against fusion glycoprotein (F) and nucleoprotein (N) of NiV was  
 107 then investigated in sera obtained from vaccinated animals at 42 DPI. A low titer of binding  
 108 antibodies against N was found in sera from animal 1, and antibodies against F were detected in  
 109 sera from animal 1, 7, and 8 (Figure 2F).  
 110

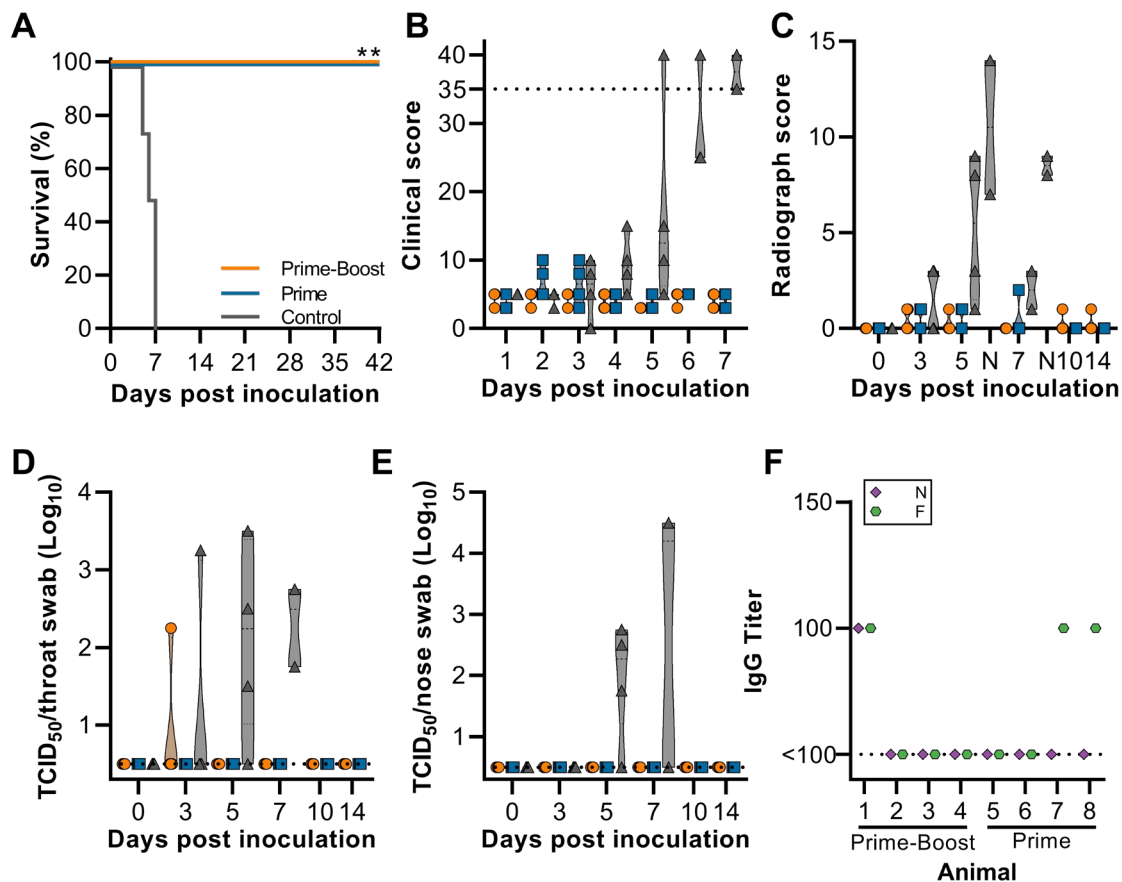

111  
 112 **Figure 2. Clinical signs and NiV detection in vaccinated AGMs upon virus challenge.** 28  
 113 days post final vaccination, AGMs (N=4 per group) were inoculation with NiV-B and monitored  
 114 for up to 42 days. (A) Survival of AGMs. (B) Truncated violin plot of daily clinical score. Dotted  
 115 line indicates score requiring euthanasia. (C) Truncated violin plot of thoracic radiograph scores  
 116 on exam days and day of necropsy (N, controls only). (D/E) Truncated violin plots of infectious

117 NiV in throat swabs (D) and nose swabs (E). At 7 DPI, only 2 control animals were part of the  
118 study. Dotted line indicates limit of detection. (F) Truncated violin plot shows lack of evidence  
119 of NiV- nucleoprotein (N, purple diamond) or NiV- fusion glycoprotein (F, green octagon) -  
120 specific IgG in serum at 42 DPI. Dotted line indicates limit of detection. For all panels, orange  
121 indicates prime-boost vaccinated animals, blue indicates prime only vaccinated animals, and  
122 grey indicates control animals.

123

#### 124 *No evidence of NiV detected in tissues of vaccinated animals*

125 Animals were euthanized when euthanasia criteria were reached (control group, 5-7 DPI) or at  
126 42 DPI (end of study, vaccinated animals). Lung:body weight ratio, indicative of edema, was  
127 higher for control animals than for vaccinated animals (Figure 3A). At necropsy, the percentage  
128 of each lung lobe that showed lesions was scored. Whereas a high percentage of gross lesions  
129 was observed in control animals (50 out of 56 lung lobes, median 50%), this was almost  
130 completely absent in vaccinated animals (9 out of 56 lung lobes, median 0% for both prime-  
131 boost and prime-only vaccinated groups) (Figure 3B). Lungs of control animals failed to collapse  
132 (3 out of 4), and pleural effusion was observed in all animals. Cervical lymph node enlargement  
133 and edematous mediastinal lymph nodes were observed in 2 and 3 out of 4 control animals,  
134 respectively. One animal showed a diffuse hemorrhage from the medulla oblongata to the  
135 cervical spinal cord, with petechiae on the cerebellum.

136 Histologically, no pulmonary pathology consistent with NiV lesions was observed in  
137 vaccinated animals (Figure 4A-B), and subsequently the pathology score was low (Figure 3C).  
138 Likewise, no NiV RNA staining was detected in lung tissue (Figure 4D-E). In stark contrast,  
139 histological lesions were present in lung tissue obtained from all control animals and were  
140 characterized as multifocal, random, minimal (1-10%) to marked (51-75%) bronchointerstitial  
141 pneumonia. The pneumonia was characterized by thickening of alveolar septa by edema fluid  
142 and fibrin and small to moderate numbers of macrophages, syncytial cells and neutrophils  
143 (Figure 4C). In situ hybridization reveals abundant viral RNA distributed throughout lesions in  
144 vascular endothelium and type I&II pneumocytes in tissue from control animals (Figure 4F).  
145 Infectious virus was only detected in tissue obtained from control animals, and not in tissue  
146 obtained from vaccinated animals (Figure 3D, S1).

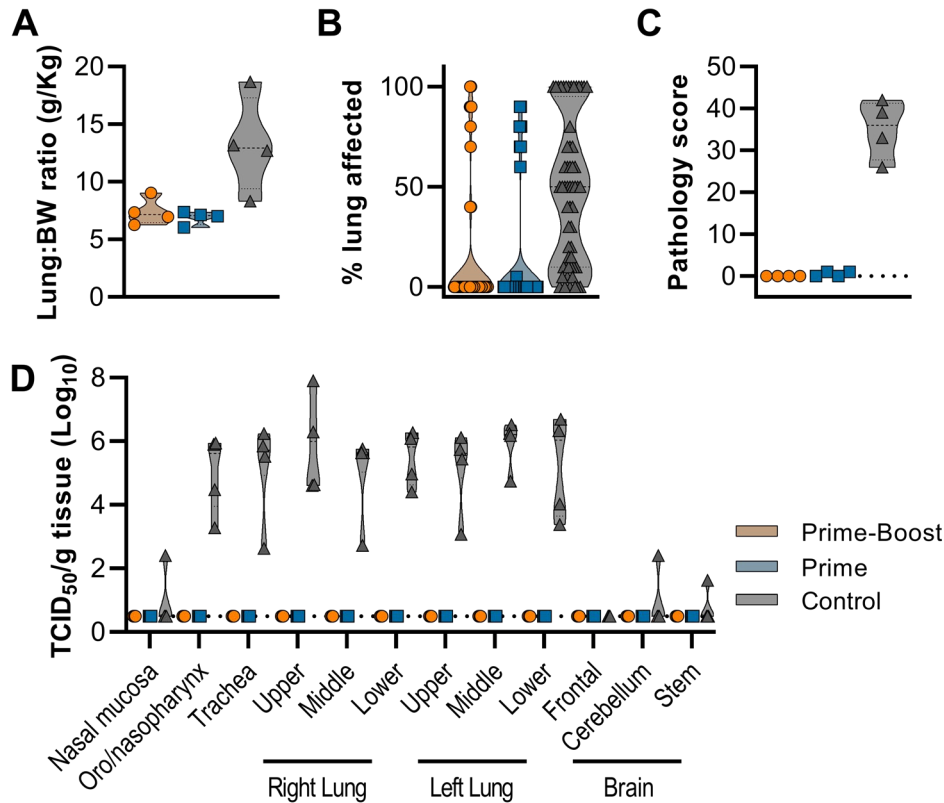

147

148 **Figure 3. No evidence of NiV infection detected in vaccinated animals.** AGMs were  
149 euthanized when a clinical score of 35 was reached (all control animals, 5-7 DPI) or on 42 DPI  
150 (all vaccinated animals). **(A)** Truncated violin plot of lung:body weight (BW) ratio. **(B)**  
151 Truncated violin plot of gross lung lesions, which were scored for each lung lobe, ventral and  
152 dorsal. **(C)** Truncated violin plot of pathology score. All six lung lobes were scored and  
153 cumulative score is shown per animal (maximum score = 90). **(D)** Truncated violin plot of  
154 infectious virus detected in respiratory tract and brain tissue. For all panels, orange indicates  
155 prime-boost vaccinated animals, blue indicates prime only vaccinated animals, and grey  
156 indicates control animals. No statistical tests were performed since samples were obtained on  
157 different days post challenge.

158



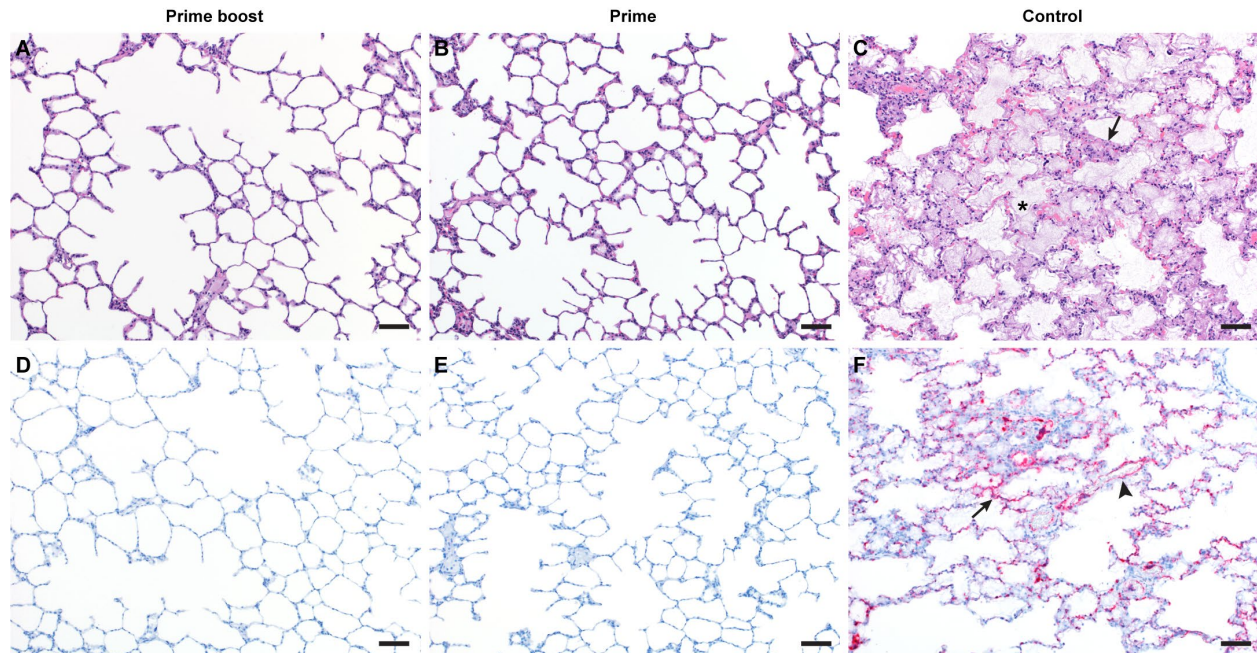

159

160 **Figure 4. Pulmonary effects of ChAdOx1-NiV vaccine efficacy in the AGM model of NiV**  
161 **infection. (A-C)** Lung tissue sections were stained with hematoxylin and eosin. (A-B) no  
162 pathology was observed. (C) moderate to marked interstitial pneumonia (arrow) with abundant  
163 fibrin and edema (asterisk). **(D-F)** In situ hybridization for NiV RNA, resulting in a red stain. (D-  
164 E) no immunoreactivity was observed. (F) Immunoreactive vascular endothelium (arrowhead)  
165 and pneumocytes (arrow). 100x bar = 50µm.

166

## 167 Discussion

168 We evaluated the vaccine candidate ChAdOx1 NiV, which we previously showed to be fully  
169 protective in Syrian hamsters<sup>20</sup>, in the lethal AGM NiV challenge model. We show here that a  
170 single dose of ChAdOx1 NiV was fully protective against a lethal challenge with NiV-B in  
171 AGMs. Furthermore, we found very limited evidence of virus replication in vaccinated animals;  
172 all but one swab was negative for infectious virus, no virus was found in tissues obtained from  
173 vaccinated animals, and no to a very limited immune response was detected against NiV F or N  
174 proteins after challenge of vaccinated animals. These data suggest the vaccine may provide close  
175 to complete protective immunity in AGMs.

176 Bossart *et al.*<sup>23</sup> show a similar lack of NiV-F specific antibodies in vaccinated animals. In that  
177 study, AGMs were vaccinated with a HeV-G subunit vaccine 6 and 3 weeks before challenge  
178 with a lethal dose of NiV. Serum was obtained throughout the experiment and NiV F-specific  
179 IgM could not be detected at any point. Furthermore, whereas vaccination induced high IgG  
180 titers against NiV-G and HeV-G, there was no increase in G-specific IgG titers after challenge

181 with NiV. Together, these data suggest a lack of virus replication in vaccinated animals<sup>23</sup>.  
182 Likewise, in a study performed by Lo *et al.*<sup>24</sup>, hamsters were vaccinated with replication-  
183 deficient VSV-based NiV G or NiV F. VN titers were measured in serum obtained at 28 days  
184 post vaccination and 32 days post challenge. No anamnestic response was detected in vaccinated  
185 animals, suggesting that this vaccine may also provide (near) complete proimmunity<sup>24</sup>. In a study  
186 by Prescott *et al.*, AGMs were vaccinated with rVSV-EBOV-GP-NiVG, 29 days before  
187 challenge with NiV Malaysia. An increase in binding and neutralizing antibodies titer between 0  
188 DPI and 16/17 DPI (termination of study) was found in 2/3 vaccinated animals<sup>25</sup>.  
189 The approval of a NiV vaccine is hindered by the feasibility of an efficacy trial due to the  
190 sporadic nature of infections, the large geographical area where the spillover occurs and the low  
191 number of annual cases<sup>26</sup>. To address these complications, the U.S. Food and Drug  
192 Administration implemented the ‘Animal Rule’ in 2002<sup>27</sup>. This rule can be utilized to establish  
193 efficacy based on studies performed in animal models that faithfully recapitulate human disease,  
194 such as the AGM and hamster NiV model<sup>26</sup>. Thus far, 18 products have been approved via this  
195 route<sup>28</sup>. In both hamster and AGM NiV models, vaccination with ChAdOx1 NiV resulted in  
196 induction of high antibody titers coupled with complete protection against lethal NiV disease.  
197 ChAdOx1 NiV is based on the same vector as ChAdOx1 nCoV-19, which has been approved for  
198 emergency use in over 60 countries worldwide. Subsequently, 100 million people have been  
199 vaccinated with the vector. Safety profiles obtained in ChAdOx1 nCoV-19 clinical studies<sup>29</sup>  
200 combined with efficacy studies in animal models<sup>20</sup> may provide sufficient information for  
201 approval of ChAdOx1 NiV.  
202 Although several NHP studies have successfully investigated the efficacy of NiV vaccines<sup>23,25,30–</sup>  
203 <sup>32</sup>, thus far only one vaccine has advanced into clinical trials. Here, we show that the widely used  
204 ChAdOx1 vector can be modified to provide protection against NiV in a lethal NHP model.  
205 Previously, similar work investigating the efficacy of a ChAdOx1 MERS vaccine in rhesus  
206 macaques<sup>33</sup> was instrumental in the development of the ChAdOx1 nCoV-19 vaccine<sup>34</sup>. If the  
207 next pandemic were to be caused by a member of the genus *Henipavirus*, the current study could  
208 be influential in the development of a rapid vaccine. Future studies, such as Phase I clinical trial  
209 studies and further efficacy studies in AGMs, should aim to obtain approval via the FDA Animal  
210 Rule.

## 212 **Materials and Methods**

### 213 *Ethics Statement*

214 The Institutional Animal Care and Use Committee (IACUC) at Rocky Mountain Laboratories approved  
215 all animal study requests, which were conducted in an Association for Assessment and Accreditation of  
216 Laboratory Animal Care (AAALAC)-accredited facility, following the basic principles and guidelines in  
217 the Guide for the Care and Use of Laboratory Animals 8th edition, the Animal Welfare Act, United States  
218 Department of Agriculture and the United States Public Health Service Policy on Humane Care and Use  
219 of Laboratory Animals.

220 Animals were kept in climate-controlled rooms with a fixed light/dark cycle (12-hours/12-hours). African  
221 green monkeys were housed in individual primate cages allowing social interactions, fed a commercial  
222 monkey chow, treats and fruit with ad libitum water and were monitored at least twice daily.

223 Environmental enrichment consisted of a variety of human interaction, commercial toys, videos, and  
224 music. The Institutional Biosafety Committee (IBC) approved work with infectious Nipah virus strains  
225 under BSL4 conditions. All sample inactivation was performed according to IBC approved standard  
226 operating procedures for removal of specimens from high containment<sup>35,36</sup>.

### 227 *Study design animal experiments*

228 12 African green monkeys (6M, 6F) between 3-5 years old were sorted by sex, then by weight, and then  
229 randomly divided into three groups of four animals. Group 1 was vaccinated with ChAdOx1 NiV at -56  
230 and -28 DPI, group 2 was vaccinated with ChAdOx1 NiV at -28 DPI, group 3 was vaccinated with  
231 ChAdOx1 GFP at -56 and -28 DPI. All vaccinations were done intramuscularly with  $2.5 \times 10^{10}$  VP/animal  
232 diluted in sterile PBS. Animals were challenged with Nipah Bangladesh (AY988601) diluted in sterile  
233 DMEM at 0 DPI; 4 mL intratracheally ( $2.5 \times 10^4$  TCID<sub>50</sub>/mL) and 1 mL intranasally ( $1 \times 10^5$   
234 TCID<sub>50</sub>/mL). Animals were scored daily by the same person who was blinded to study group allocations  
235 using a standardized scoring sheet<sup>37</sup>. Scoring was based on the following criteria: general appearance,  
236 skin and coat appearance, discharge, respiration, feces and urine appearance, appetite, and activity.  
237 Clinical exams were performed on -56, -42, -28, -14, 0, 3, 5, 7, 10, 14, 21, 28, 35, and 42 DPI. Blood,  
238 nasal, and throat swabs were collected on all exam dates. Hematology analysis was completed on a  
239 ProCytex DX (IDEXX Laboratories, Westbrook, ME, USA) and the following parameters were evaluated:  
240 red blood cells (RBC), hemoglobin (Hb), hematocrit (HCT), mean corpuscular volume (MCV), mean  
241 corpuscular hemoglobin (MCH), mean corpuscular hemoglobin concentration (MCHC), red cell  
242 distribution weight (RDW), platelets, mean platelet volume (MPV), white blood cells (WBC), neutrophil  
243 count (abs and %), lymphocyte count (abs and %), monocyte count (abs and %), eosinophil count (abs  
244 and %), and basophil count (abs and %). Serum chemistries were completed on a VetScan VS2  
245 Chemistry Analyzer (Abaxis, Union City, CA) and the following parameters were evaluated: glucose,

246 blood urea nitrogen (BUN), creatinine, calcium, albumin, total protein, alanine aminotransferase (ALT),  
247 aspartate aminotransferase (AST), alkaline phosphatase (ALP), total bilirubin, globulin, sodium,  
248 potassium, chloride, and total carbon dioxide. Ventro-dorsal and right/left lateral radiographs were taken  
249 on clinical exam days prior to any other procedures. Radiographs were evaluated and scored for the  
250 presence of pulmonary infiltrates by two board-certified clinical veterinarians according to a standard  
251 scoring system<sup>22</sup>. Briefly, each lung lobe (upper left, middle left, lower left, upper right, middle right,  
252 lower right) was scored individually based on the following criteria: 0 = normal examination; 1 = mild  
253 interstitial pulmonary infiltrates; 2 = moderate interstitial pulmonary infiltrates, perhaps with partial  
254 cardiac border effacement and small areas of pulmonary consolidation (alveolar patterns and air  
255 bronchograms); and 3 = pulmonary consolidation as the primary lung pathology, seen as a progression  
256 from grade 2 lung pathology. Day 0 radiographs are taken prior to inoculation, and thus serve as a  
257 baseline for each animal. All subsequent radiographs are compared to the Day 0 radiographs, evaluated  
258 for changes from baseline and scored based on the criteria noted above. At study completion, thoracic  
259 radiograph findings are reported as a single cumulative radiograph score for each animal on each exam  
260 day; scores may range from 0 to 18. Necropsy was performed on 42 DPI or when euthanasia criteria was  
261 reached.

#### 262 *Generation of vaccine ChAdOx1 NiV*

263 ChAdOx1 NiV was produced as previously described<sup>20</sup>. Briefly, the G gene from Nipah virus  
264 (Bangladesh outbreak 2008-2010, Genbank accession number: JN808864.1) was codon optimized for  
265 humans, synthesized by GeneArt (Thermo Fisher Scientific), and cloned into a transgene expression  
266 plasmid comprising a modified human cytomegalovirus immediate early promoter (CMV promoter) with  
267 tetracycline operator (TetO) sites and the polyadenylation signal from bovine growth hormone (BGH).  
268 This expression cassette was inserted into the E1 locus of the genomic clone of ChAdOx1 using site-  
269 specific recombination<sup>38</sup>. The virus was rescued and propagated in T-REx-293 cells (Invitrogen).  
270 Purification was by CsCl gradient ultracentrifugation, virus titers were determined by hexon  
271 immunostaining assay and viral particles were calculated based on spectrophotometry<sup>39,40</sup>.

#### 272 *Cells and virus*

273 NiV (strain Bangladesh/200401066) was kindly provided by the Special Pathogens Branch of the Centers  
274 for Disease Control and Prevention, Atlanta, Georgia, United States. This isolate was obtained from a  
275 throat swab collected from patient #3001 (10-year old male) in Bangladesh on January 22, 2004. The  
276 patient developed altered mental status, cough, and breathing difficulties on January 21. The patient was  
277 admitted to Goalando Hospital, Bangladesh, on January 22. None of the patient's contacts developed NiV  
278 infection; the patient is presumed to have been infected via direct spillover from the bat reservoir (Dr.  
279 Steve Luby, personal communication)<sup>41</sup>. All virus propagation was performed in VeroE6 cells cultured in

280 Dulbecco's modified Eagle's medium (DMEM, Sigma) supplemented with 2% fetal bovine serum  
281 (Gibco), 1 mM L-glutamine (Gibco), 50 U/ml penicillin (Gibco), and 50 µg/ml streptomycin (Gibco) (2%  
282 DMEM). VeroE6 cells were maintained in DMEM supplemented with 10% fetal calf serum, 1 mM L  
283 glutamine, 50 U/ml penicillin and 50 µg/ml streptomycin.

#### 284 *Titration assay*

285 Virus titrations were performed by end-point titration in VeroE6 cells, which were inoculated with tenfold  
286 serial dilutions of virus swab media or tissue homogenates. After 1hr incubation at 37°C and 5% CO<sub>2</sub>,  
287 tissue homogenate dilutions were removed, washed twice with PBS and replaced with 100 µl 2% DMEM.  
288 Cytopathic effect was scored at 5 DPI and the TCID<sub>50</sub> was calculated from a minimum of 4 replicates by  
289 the Spearman-Kärber method<sup>42</sup>.

#### 290 *Virus neutralization assay*

291 Heat-inactivated sera (30 min, 56 °C) was serially diluted (2x) in 2% DMEM. Hereafter, 100 TCID<sub>50</sub> of  
292 NiV was added. After 1hr of incubation at 37 °C and 5% CO<sub>2</sub>, serum:virus mixture was added to VeroE6  
293 cells and incubated at 37°C and 5% CO<sub>2</sub>. At 5 DPI, cytopathic effect was scored. The virus neutralization  
294 titer was expressed as the reciprocal value of the highest dilution of the serum which still inhibited virus  
295 replication.

#### 296 *Production NiV G and F proteins*

297 Nipah proteins were produced as previously described<sup>20</sup>. Briefly, NiV-G Malaysia (residues E144 - T602,  
298 gene accession number NC\_002728) was cloned into the pHLSEC mammalian expression vector<sup>43</sup> and  
299 NiV-F Malaysia (residues G26 - D482, gene accession number AY816748.1) was cloned into the  
300 pHLSEC vector containing a C-terminal GCNt trimerization motif<sup>44</sup>. The constructs were transiently  
301 expressed in human embryonic kidney (HEK) 293T cells. Supernatant was diafiltrated using the AKTA  
302 FLUX system (GE Healthcare) against either PBS, pH 7.4 (NiV-G) or buffer containing 10 mM Tris and  
303 150 mM NaCl, pH 8.0 (NiV-F). The proteins were further purified by Ni-NTA immobilized metal-  
304 affinity chromatography using His-Trap HP columns (GE Healthcare) followed by size exclusion  
305 chromatography. NiV-G was purified using a Superdex 200 10/300 Increase GL column (GE healthcare)  
306 equilibrated in PBS pH 7.4 and NiV-F was purified using a Superose 6 Increase 10/300 GL column (GE  
307 healthcare) equilibrated in 10 mM Tris and 150 mM NaCl pH 8.0.

#### 308 *Enzyme-linked immunosorbent assay for Nipah G, N, and F proteins*

309 Maxisorp plates (Nunc) were coated overnight at 4°C with 5 µg of G, N (Native Antigen Company) or F  
310 protein per plate in Carb/Bicarb binding buffer (4.41 g KHCO<sub>3</sub> and 0.75 g Na<sub>2</sub>CO<sub>3</sub> in 1 L distilled water).  
311 After blocking with 5% milk in PBS with 0.01% tween (PBST), serum in 5% milk in PBST was  
312 incubated at RT for 1 hr. Antibodies were detected using affinity-purified antibody peroxidase-labeled

313 goat-anti-monkey IgG (Seracare) in 5% milk in PBST and TMB 2-component peroxidase substrate  
314 (Seracare) and read at 450 nm. All wells were washed 3x with PBST in between steps.

### 315 *ELISpot assay and ICS analysis*

316 PBMCs were isolated from ethylene diamine tetraacetic acid (EDTA) whole blood using Leucosep™  
317 tubes (Greiner Bio-one International GmbH) and Histopaque®-1077 density gradient cell separation  
318 medium (Sigma-Aldrich) according to the manufacturers' instructions. The ImmunoSpot® Human IFN- $\gamma$   
319 Single-Color Enzymatic ELISpot Assay Kit was utilized according to the manufacturer's protocol  
320 (Cellular Technology Limited). PBMCs were plated at a concentration of 300,000 cells per well and were  
321 stimulated with six contiguous peptide pools spanning the length of the G protein sequence at a  
322 concentration of 2  $\mu\text{g}/\text{mL}$  per peptide. One peptide (sequence AFNTVIALLGSIIVII) was excluded due to  
323 false positive results. Analysis was performed using the CTL ImmunoSpot® Analyzer and ImmunoSpot®  
324 Software (Cellular Technology Limited). Spot forming units (SFU) per  $1.0 \times 10^6$  PBMCs were summed  
325 across the 6 peptide pools for each animal.

### 326 *Histology and in situ hybridization*

327 Harvested tissues were fixed for a minimum of 7 days in 10% neutral-buffered formalin and subsequently  
328 embedded in paraffin. Hematoxylin and eosin (H&E) staining and in situ hybridization (ISH) were  
329 performed on tissue sections and cell blocks. Detection of NiV viral RNA was performed using the  
330 RNAscope FFPE assay (Advanced Cell Diagnostics Inc., Newark, USA) as previously described<sup>45</sup> and in  
331 accordance with the manufacturer's instructions. Briefly, tissue sections were deparaffinized and  
332 pretreated with heat and protease before hybridization with target-specific probes for NiV or HeV.  
333 Ubiquitin C and the bacterial gene, *dapB*, were used as positive and negative controls, respectively.  
334 Whole-tissue sections for selected cases were stained for NiV and HeV viral RNA, UBC and *dapB* by the  
335 RNAscope VS FFPE assay (RNAscopeVS, Newark, USA) using the Ventana Discovery XT slide  
336 autostaining system (Ventana Medical Systems Inc., Tucson, USA). A board-certified veterinary  
337 anatomic pathologist blinded to the study groups evaluated all tissue slides. Pathology score was  
338 determined by scoring 6 lung lobes for each animal for the following characteristics: lymphoid cuffing;  
339 pneumonia, bronchointerstitial, with fibrin, edema and syncytial cells; and perivascular and alveolar  
340 edema and fibrin. Scoring was as follows: 0 = no lesions; 1 = 1-10%; 2 = 11-25%; 3 = 26-50%; 4 = 51-  
341 75%; 5 = 76-100%. All scores per animal were added to allow a maximum score of 90.

### 342 *Statistical analysis*

343 Kruskal-Wallis test for multiple comparisons was used to test for statistical significance. P-values < 0.05  
344 were significant.

345

346 **Supplementary Materials**

347 Fig. S1. Presence of infectious virus in non-respiratory or -brain tissue of African green monkeys  
348 inoculated with Nipah virus.

349 Table S1. Clinical signs in AGMs inoculated with NiV-B.

350

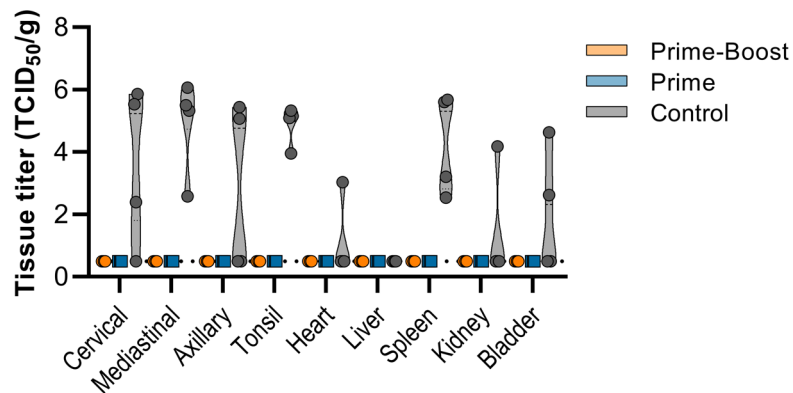

351

352 **Figure S1. Presence of infectious virus in non-respiratory or brain tissue of African green**  
353 **monkeys inoculated with Nipah virus.** Violin plot of infectious virus detected in respiratory  
354 tract and brain tissue. Orange circles, prime-boost vaccine; blue squares, prime-only vaccine;  
355 grey triangles, controls. No statistical tests were performed since samples were obtained on  
356 different days.

357

| Treatment                     | Animal | 1         | 2         | 3         | 4             | 5                 | 6                             | 7                                              |
|-------------------------------|--------|-----------|-----------|-----------|---------------|-------------------|-------------------------------|------------------------------------------------|
| Prime-Boost<br>ChAdOx1<br>NiV | 1      | RA, 3     | RA, 3     | RA, 3     | RA, 3         | RA, 3             | RA, 5                         | RA, 5                                          |
|                               | 2      | RA, 5     | RA, 5     | RA, 5     | RA, 5         | RA, 3             | RA, 5                         | RA, 3                                          |
|                               | 3      | RA, 5     | RA, 5     | RA, 5     | RA, 5         | RA, 3             | RA, 5                         | RA, 5                                          |
|                               | 4      | RA, 5     | RA, 5     | RA, 5     | RA, 3         | RA, 3             | RA, 3                         | RA, 3                                          |
| Prime<br>ChAdOx1<br>NiV       | 5      | RA, 3     | RA, 8     | RA, 8     | RA, 3         | RA, 3             | RA, 5                         | RA, 5                                          |
|                               | 6      | RA, 3     | RA, 10    | RA, 10    | RA, 5         | RA, 5             | RA, 5                         | RA, 3                                          |
|                               | 7      | RA, 3     | RA, 5     | RA, 3     | RA, 5         | RA, 3             | RA, 5                         | RA, 5                                          |
|                               | 8      | RA, 5     | RA, 5     | RA, 5     | RA, 3         | RA, 5             | RA, 5                         | RA, 5                                          |
| Prime-Boost<br>ChAdOx1<br>GFP | 9      | RA, RF, 3 | RA, RF, 5 | RA, RF, 3 | RA, RF, 8     | RA, RF, 5         | RA, HP, RF, ND, IR 25         | RA, HP, RF, 40<br>Fever 40.3°C, ND, IR, OM, CY |
|                               | 10     | RA,5      | RA, 5     | -, 0      | RA, IR, 8     | IR,5              | RA, RF, IR, NS, 25            | HP, RF, RA, IR, NS, 35                         |
|                               | 11     | RA, 5     | RA, 5     | RA, 5     | RA, IR,10     | HP, RA, IR,NS ,40 | n/a                           |                                                |
|                               | 12     | RA,5      | RA,5      | RA, IR,10 | RA, RF, IR,15 | RA, RF, IR,15     | RA, RF, HP, ND, IR, OM CY, 40 | n/a                                            |

Table S1. Clinical signs in AGMs inoculated with NiV-B. RA = reduced appetite; RF = ruffled fur; HP = hunched posture; ND= nasal discharge; IR= increased respirations, OM= open mouth breathing, CY= cyanotic, NS= neurological symptoms



## References and Notes:

1. Chua, K. B. *et al.* Nipah virus: a recently emergent deadly paramyxovirus. *Science* **288**, 1432–1435 (2000).
2. McKee, C. D. *et al.* The Ecology of Nipah Virus in Bangladesh: A Nexus of Land-Use Change and Opportunistic Feeding Behavior in Bats. *Viruses* **13**, (2021).
3. ProMED. PRO/AH/EDR> Nipah virus - Bangladesh (02) 20200203.6950171.  
<http://www.promedmail.org/post/6950171>.
4. Arunkumar, G. *et al.* Outbreak Investigation of Nipah Virus Disease in Kerala, India, 2018. *J Infect Dis* **219**, 1867–1878 (2019).
5. Chua, K. B. *et al.* Isolation of Nipah virus from Malaysian Island flying-foxes. *Microbes Infect* **4**, 145–151 (2002).
6. Rahman, S. A. *et al.* Characterization of Nipah virus from naturally infected Pteropus vampyrus bats, Malaysia. *Emerg Infect Dis* **16**, 1990–1993 (2010).
7. Reynes, J.-M. *et al.* Nipah virus in Lyle’s flying foxes, Cambodia. *Emerg Infect Dis* **11**, 1042–1047 (2005).
8. Luby, S. P. *et al.* Foodborne transmission of Nipah virus, Bangladesh. *Emerg Infect Dis* **12**, 1888–1894 (2006).
9. Rahman, M. A. *et al.* Date palm sap linked to Nipah virus outbreak in Bangladesh, 2008. *Vector Borne Zoonotic Dis* **12**, 65–72 (2012).
10. Islam, M. S. *et al.* Nipah Virus Transmission from Bats to Humans Associated with Drinking Traditional Liquor Made from Date Palm Sap, Bangladesh, 2011-2014. *Emerg Infect Dis* **22**, 664–670 (2016).

11. Halpin, K. *et al.* Pteropid bats are confirmed as the reservoir hosts of henipaviruses: a comprehensive experimental study of virus transmission. *Am J Trop Med Hyg* **85**, 946–951 (2011).
12. Gurley, E. S. *et al.* Person-to-person transmission of Nipah virus in a Bangladeshi community. *Emerg Infect Dis* **13**, 1031–1037 (2007).
13. Nikolay, B. *et al.* Transmission of Nipah Virus - 14 Years of Investigations in Bangladesh. *N Engl J Med* **380**, 1804–1814 (2019).
14. Weatherman, S., Feldmann, H. & de Wit, E. Transmission of henipaviruses. *Curr Opin Virol* **28**, 7–11 (2018).
15. Amaya, M. & Broder, C. C. Vaccines to Emerging Viruses: Nipah and Hendra. *Annu Rev Virol* **7**, 447–473 (2020).
16. Broder, C. C., Weir, D. L. & Reid, P. A. Hendra virus and Nipah virus animal vaccines. *Vaccine* **34**, 3525–3534 (2016).
17. Geisbert, T. W. *et al.* A single dose investigational subunit vaccine for human use against Nipah virus and Hendra virus. *npj Vaccines* **6**, 23 (2021).
18. Pritchard, E. *et al.* Impact of vaccination on new SARS-CoV-2 infections in the United Kingdom. *Nat Med* (2021) doi:10.1038/s41591-021-01410-w.
19. Public Health England press office. Vaccines highly effective against hospitalisation from Delta variant. <https://www.gov.uk/government/news/vaccines-highly-effective-against-hospitalisation-from-delta-variant>.
20. van Doremalen, N. *et al.* A single-dose ChAdOx1-vectored vaccine provides complete protection against Nipah Bangladesh and Malaysia in Syrian golden hamsters. *PLoS Negl Trop Dis* **13**, e0007462 (2019).

21. Geisbert, T. W. *et al.* Development of an Acute and Highly Pathogenic Nonhuman Primate Model of Nipah Virus Infection. *PLoS ONE* **5**, e10690 (2010).
22. Brining, D. L. *et al.* Thoracic radiography as a refinement methodology for the study of H1N1 influenza in cynomologus macaques (*Macaca fascicularis*). *Comp Med* **60**, 389–395 (2010).
23. Bossart, K. N. *et al.* A Hendra Virus G Glycoprotein Subunit Vaccine Protects African Green Monkeys from Nipah Virus Challenge. *Science Translational Medicine* **4**, 146ra107-146ra107 (2012).
24. Lo, M. K. *et al.* Single-dose replication-defective VSV-based Nipah virus vaccines provide protection from lethal challenge in Syrian hamsters. *Antiviral Research* **101**, 26–29 (2014).
25. Prescott, J. *et al.* Single-dose live-attenuated vesicular stomatitis virus-based vaccine protects African green monkeys from Nipah virus disease. *Vaccine* **33**, 2823–2829 (2015).
26. Price, A *et al.* Nipah Virus Assays and Animal Models for Vaccine Development. [https://media.tghn.org/medialibrary/2021/02/Nipah\\_Virus\\_Assays\\_and\\_Animal\\_Models\\_for\\_Vaccine\\_Development\\_final.pdf](https://media.tghn.org/medialibrary/2021/02/Nipah_Virus_Assays_and_Animal_Models_for_Vaccine_Development_final.pdf).
27. Snoy, P. J. Establishing Efficacy of Human Products Using Animals: The US Food and Drug Administration’s “Animal Rule”. *Vet Pathol* **47**, 774–778 (2010).
28. U.S. Food & Drug. Animal Rule Approvals. <https://www.fda.gov/drugs/nda-and-bla-approvals/animal-rule-approvals> (2021).
29. Voysey, M. *et al.* Safety and efficacy of the ChAdOx1 nCoV-19 vaccine (AZD1222) against SARS-CoV-2: an interim analysis of four randomised controlled trials in Brazil, South

- Africa, and the UK. *The Lancet* S0140673620326611 (2020) doi:10.1016/S0140-6736(20)32661-1.
30. Mire, C. E. *et al.* A Recombinant Hendra Virus G Glycoprotein Subunit Vaccine Protects Nonhuman Primates against Hendra Virus Challenge. *Journal of Virology* **88**, 4624–4631 (2014).
  31. Yoneda, M. *et al.* Recombinant Measles Virus Vaccine Expressing the Nipah Virus Glycoprotein Protects against Lethal Nipah Virus Challenge. *PLoS ONE* **8**, e58414 (2013).
  32. Mire, C. E. *et al.* Use of Single-Injection Recombinant Vesicular Stomatitis Virus Vaccine to Protect Nonhuman Primates Against Lethal Nipah Virus Disease. *Emerg. Infect. Dis.* **25**, 1144–1152 (2019).
  33. van Doremalen, N. *et al.* A single dose of ChAdOx1 MERS provides protective immunity in rhesus macaques. *Sci. Adv.* **6**, eaba8399 (2020).
  34. van Doremalen, N. *et al.* ChAdOx1 nCoV-19 vaccine prevents SARS-CoV-2 pneumonia in rhesus macaques. *Nature* (2020) doi:10.1038/s41586-020-2608-y.
  35. Feldmann, F., Shupert, W. L., Haddock, E., Twardoski, B. & Feldmann, H. Gamma Irradiation as an Effective Method for Inactivation of Emerging Viral Pathogens. *Am J Trop Med Hyg* **100**, 1275–1277 (2019).
  36. Haddock, E., Feldmann, F. & Feldmann, H. Effective Chemical Inactivation of Ebola Virus. *Emerg Infect Dis* **22**, 1292–1294 (2016).
  37. Munster, V. J. *et al.* Respiratory disease in rhesus macaques inoculated with SARS-CoV-2. *Nature* **585**, 268–272 (2020).

38. Dicks, M. D. J. *et al.* A Novel Chimpanzee Adenovirus Vector with Low Human Seroprevalence: Improved Systems for Vector Derivation and Comparative Immunogenicity. *PLoS ONE* **7**, e40385 (2012).
39. Bewig, B. & Schmidt, W. E. Accelerated Titering of Adenoviruses. *BioTechniques* **28**, 870–873 (2000).
40. Maizel, J. V., White, D. O. & Scharff, M. D. The polypeptides of adenovirus. *Virology* **36**, 115–125 (1968).
41. de Wit, E. *et al.* Foodborne Transmission of Nipah Virus in Syrian Hamsters. *PLoS Pathog* **10**, e1004001 (2014).
42. Kärber, G. Beitrag zur kollektiven Behandlung pharmakologischer Reihenversuche. *Archiv f. experiment. Pathol. u. Pharmakol* **162**, 480–483 (1931).
43. Aricescu, A. R., Lu, W. & Jones, E. Y. A time- and cost-efficient system for high-level protein production in mammalian cells. *Acta Crystallogr D Biol Crystallogr* **62**, 1243–1250 (2006).
44. Chan, Y.-P. *et al.* Biochemical, Conformational, and Immunogenic Analysis of Soluble Trimeric Forms of Henipavirus Fusion Glycoproteins. *Journal of Virology* **86**, 11457–11471 (2012).
45. Wang, F. *et al.* RNAscope. *The Journal of Molecular Diagnostics* **14**, 22–29 (2012).

**Acknowledgments:** We thank the animal caretakers, Rachel LaCasse, Danielle Adney, Thomas A. Bowden, Anita Mora, Robert Fischer, Myndi Holbrook, Ilona Rissanen, Emmie de Wit, and Trenton Bushmaker for their assistance during the study. **Funding:** This work was supported by the Division of Intramural Research of the National Institute of Allergy and Infectious Diseases (NIAID), National Institutes of Health (NIH) and CEPI (award reference: 276871). **Author contributions:** N.v.D., T.L., S.C.G. and V.J.M. designed the study; N.v.D., V.A.A., R.F., J.E.S.,

E.H., A.O., J.L., P.W.H., K.C., G.S, and V.J.M. acquired, analyzed and interpreted the data; N.v.D. and V.J.M. wrote the manuscript. All authors have approved the submitted version.

**Competing interests:** S.C.G. is a board member of Vaccitech and named as an inventor on a patent covering the use of ChAdOx1-vector-based vaccines and a patent application covering a SARS-CoV-2 (nCoV-19) vaccine (UK patent application no. 2003670.3). T.L. is named as an inventor on a patent application covering a SARS-CoV-2 (nCoV-19) vaccine (UK patent application no. 2003670.3). The University of Oxford and Vaccitech, having joint rights in the vaccine, entered into a partnership with AstraZeneca in April 2020 for further development, large-scale manufacture and global supply of the vaccine. Equitable access to the vaccine is a key component of the partnership. Neither Oxford University nor Vaccitech will receive any royalties during the pandemic period or from any sales of the vaccine in developing countries. The other authors declare no competing interests. **Data and materials availability:** If data are in an archive, include the accession number or a placeholder for it. Here also include any materials that must be obtained through an MTA. Acknowledgments follow the references and notes but are not numbered.
